# Supplementary material for: Expression of Leptin Receptor and Effects of Leptin on Papillary Thyroid Carcinoma Cells
Source: Hindawi journal article supplement (doi:10.1155/2019/5031696), 2019-02-14
Supplement: f1 [file 5031696.f1.pdf]

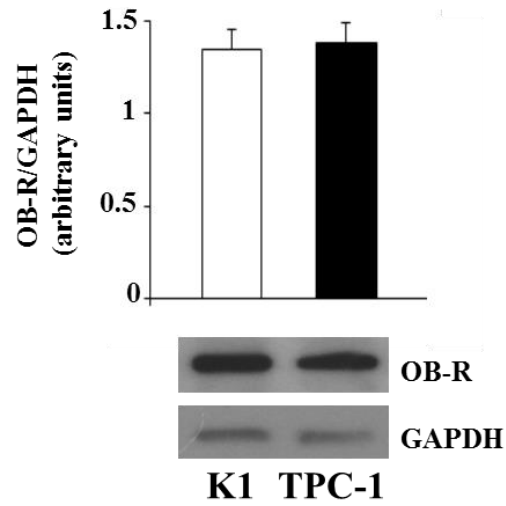

**Supplementary Figure 1**

**Supplementary Figure 1:** Expression of Leptin-receptor protein in K1 and TPC-1 cells.

Immunoblot and densitometric analysis of OB-R in K1 and TPC-1 cells. GAPDH was used as loading control. Values are expressed as ratio over the loading control (arbitrarily assigned as 1).
